# Supplementary material for: Circular RNA circMET drives immunosuppression and anti-PD1 therapy resistance in hepatocellular carcinoma via the miR-30-5p/snail/DPP4 axis
Source: Springer Nature journal article supplement (doi:10.1186/s12943-020-01213-6), 2020-05-19
Supplement: MOESM5 [file 17996952]

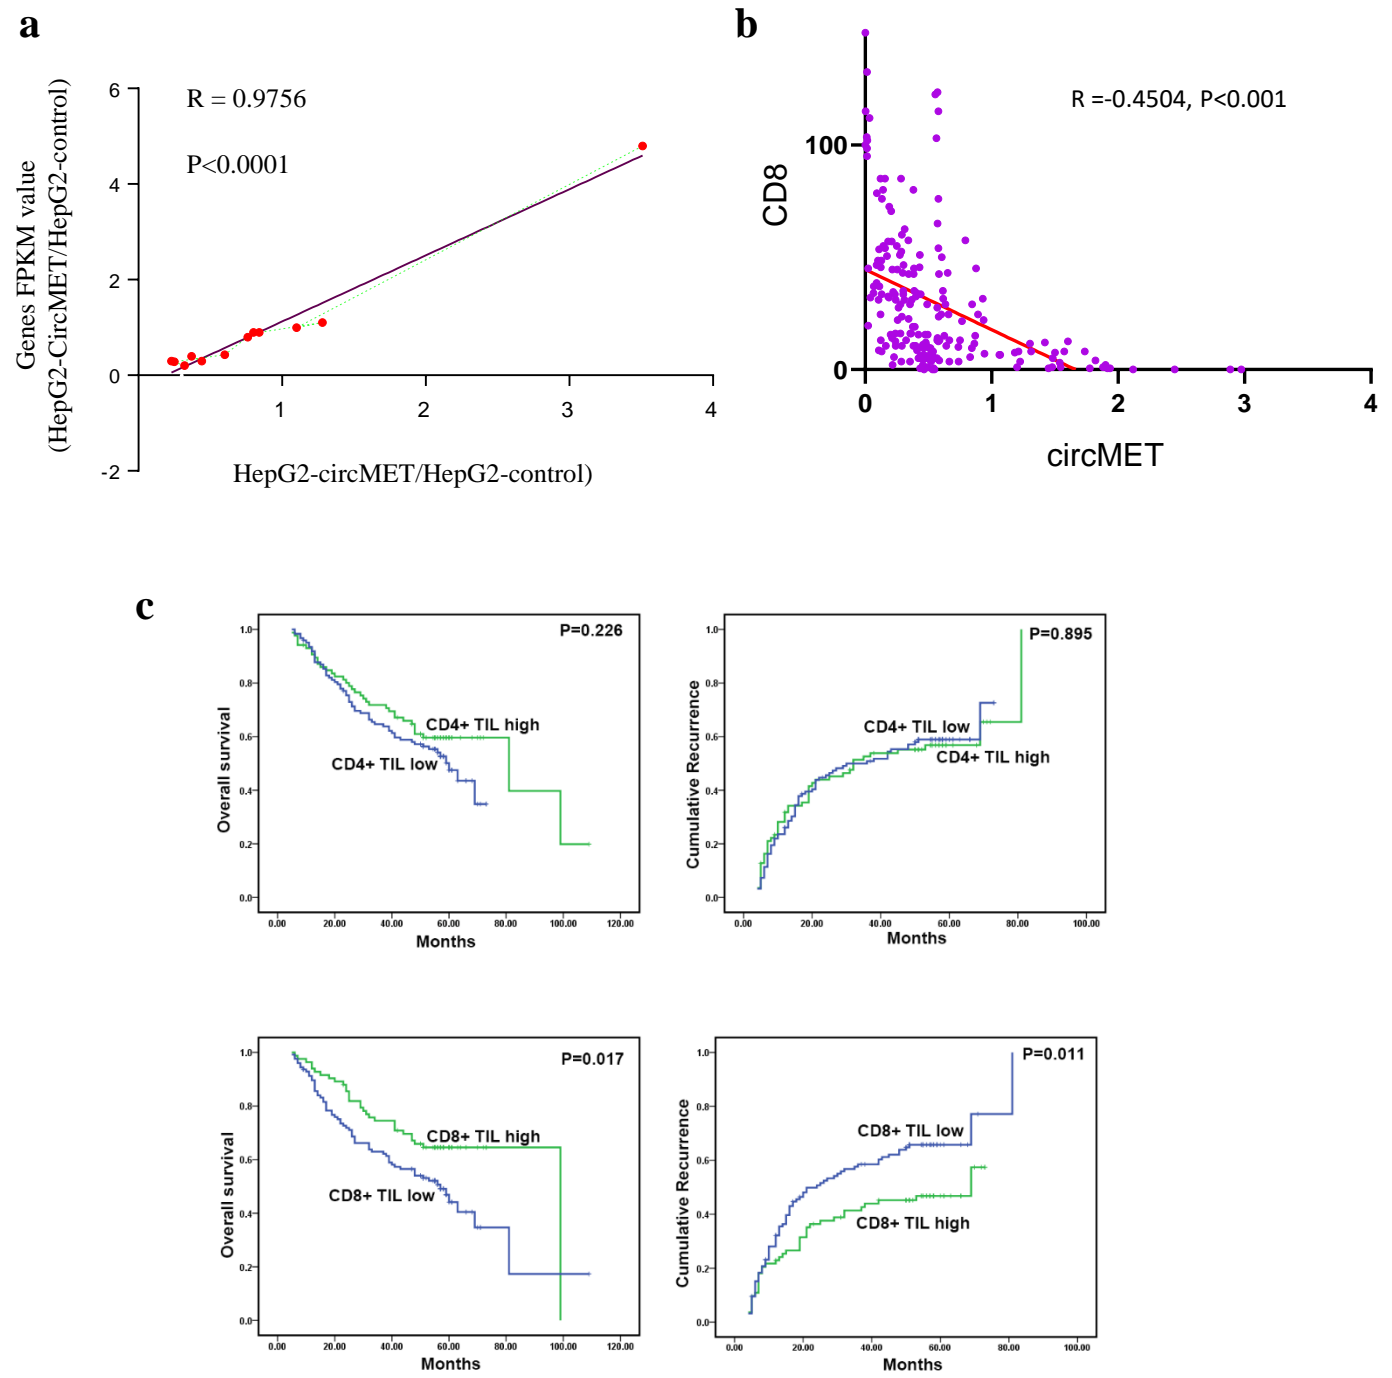

**Figure S1**

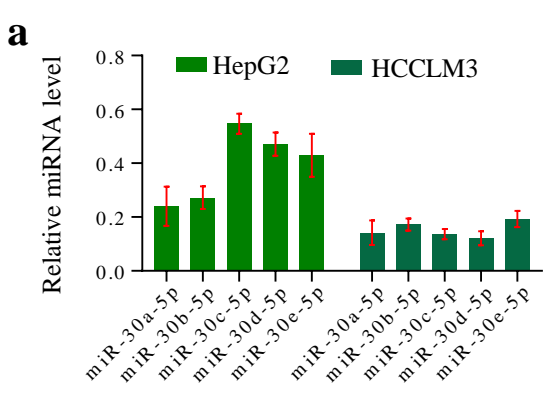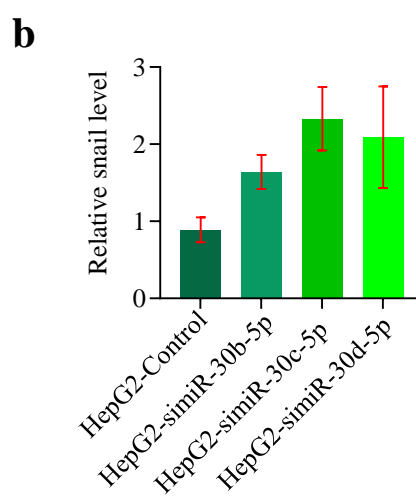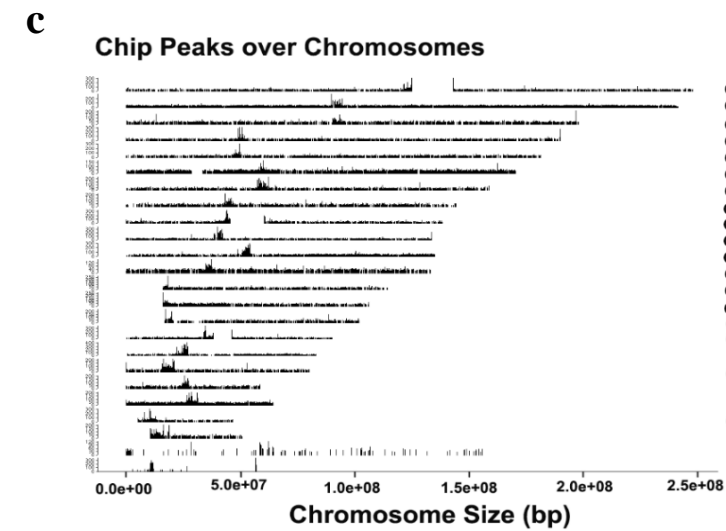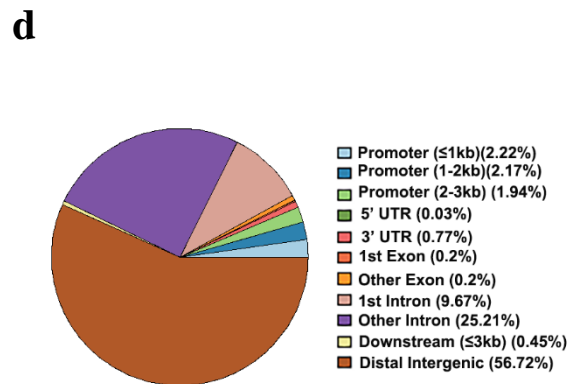

Figure S2

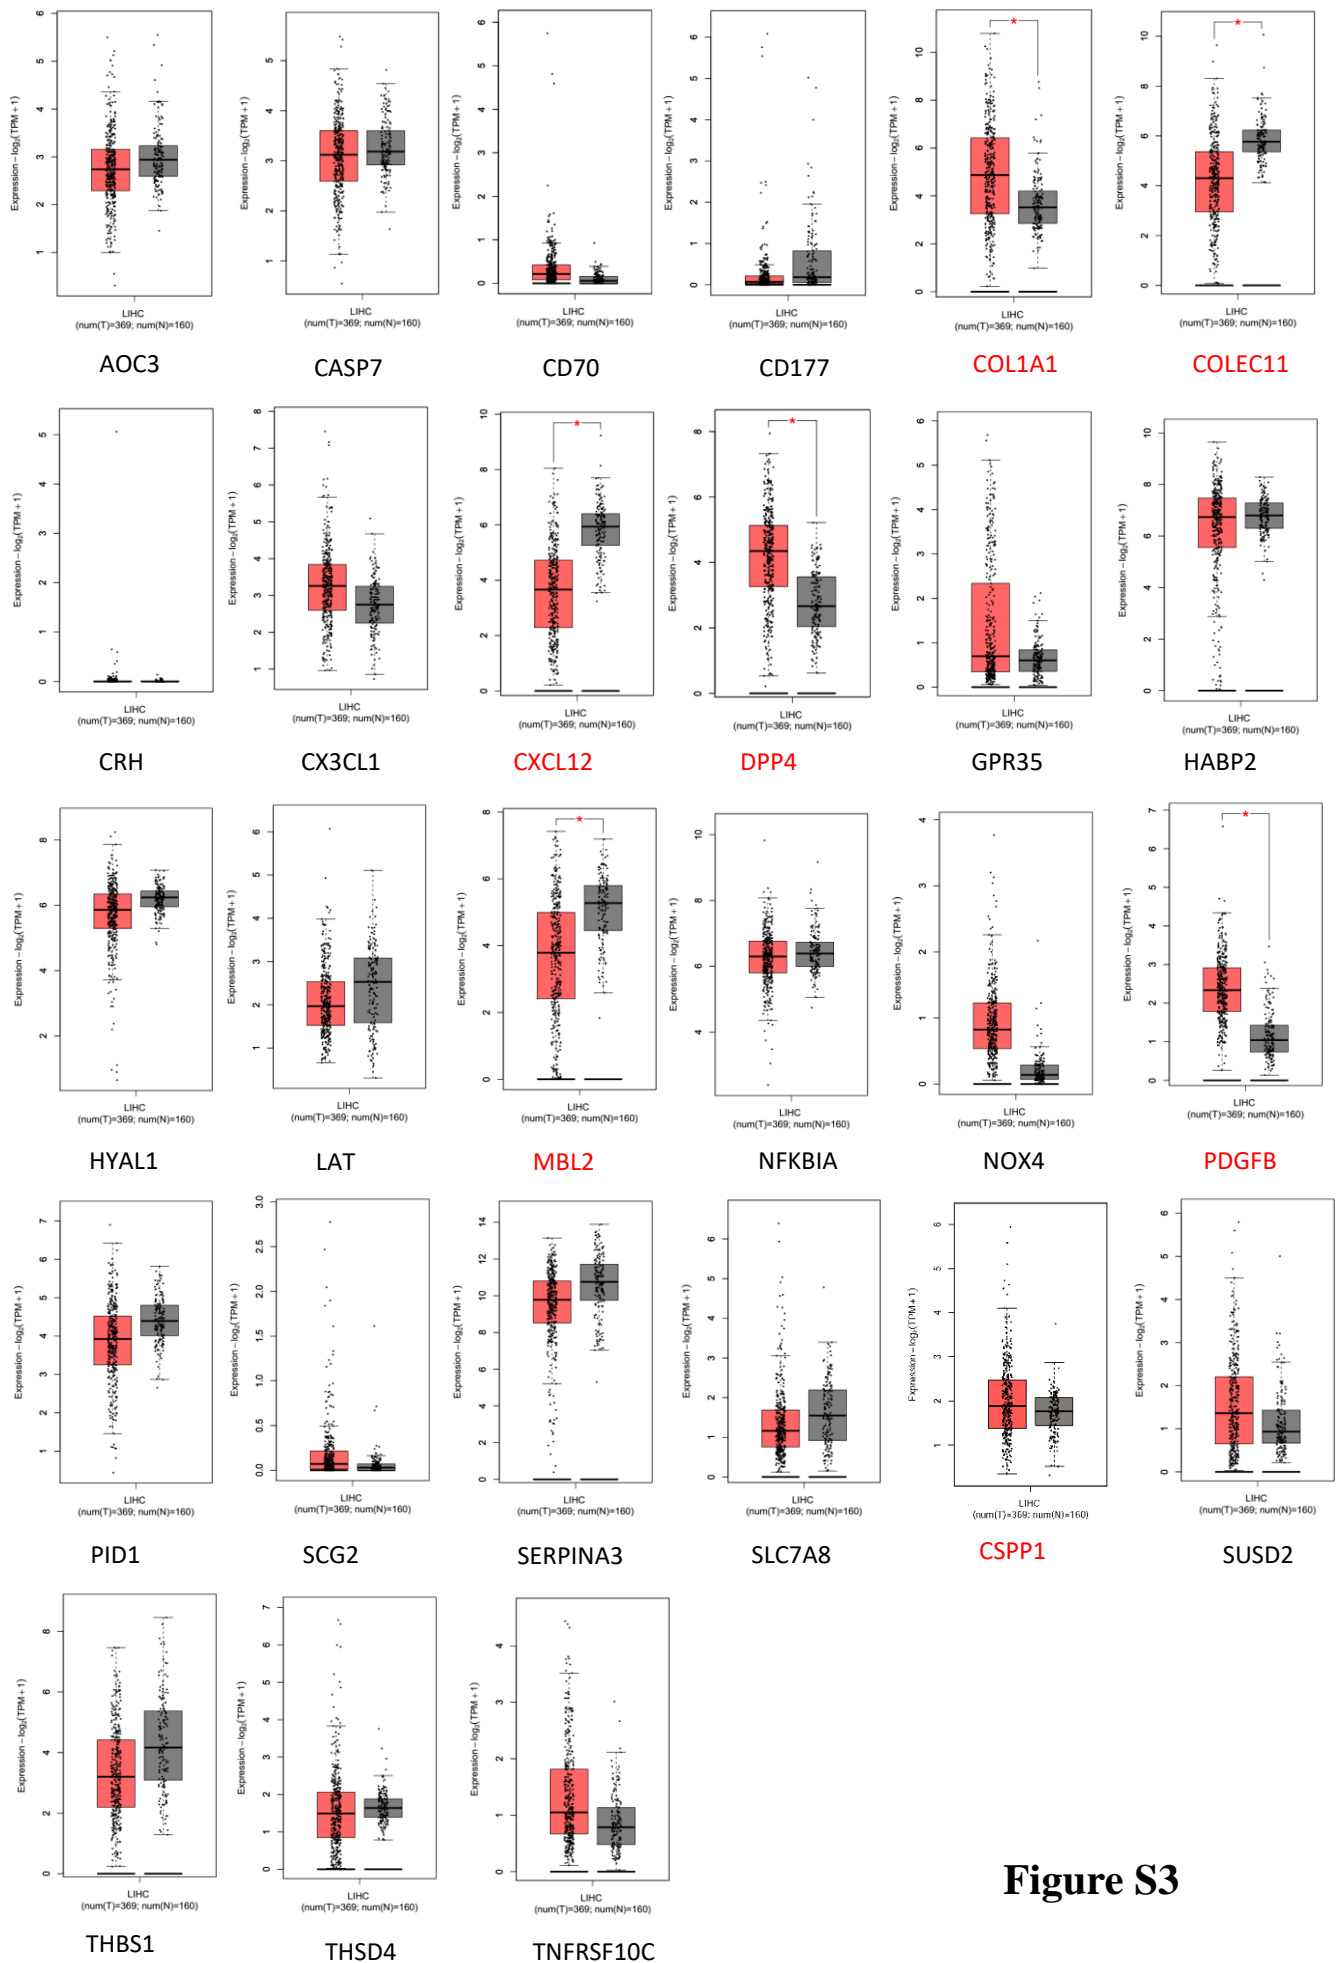

**Figure S3**

**a**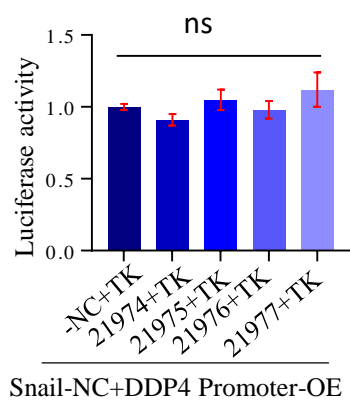**b**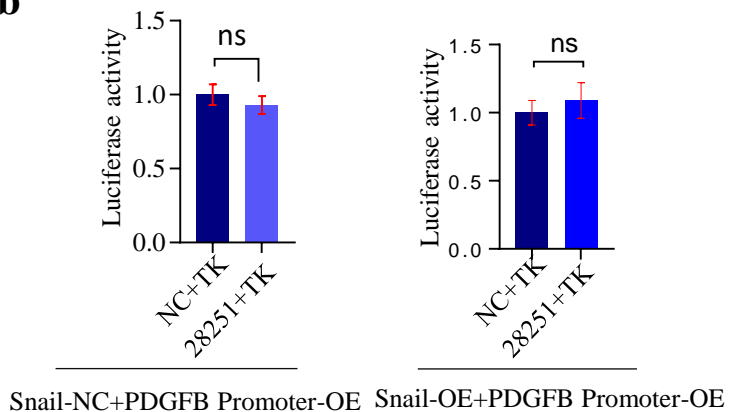**c**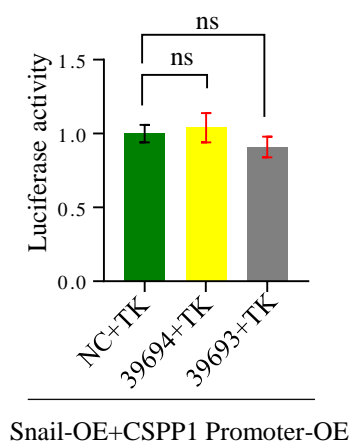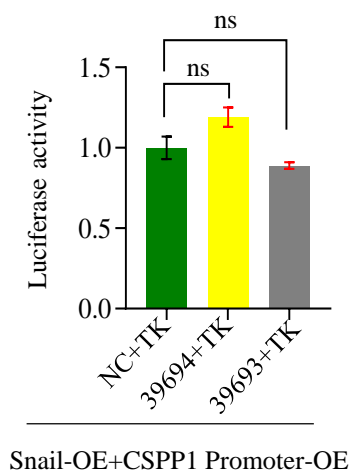**d**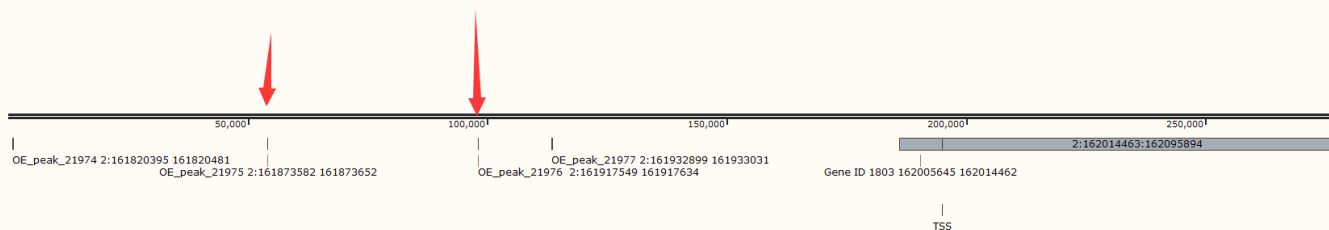**Figure S4**

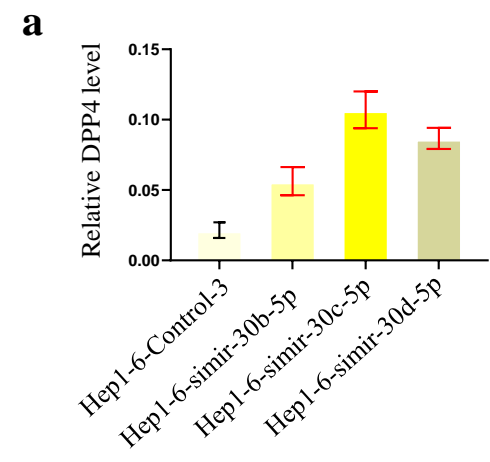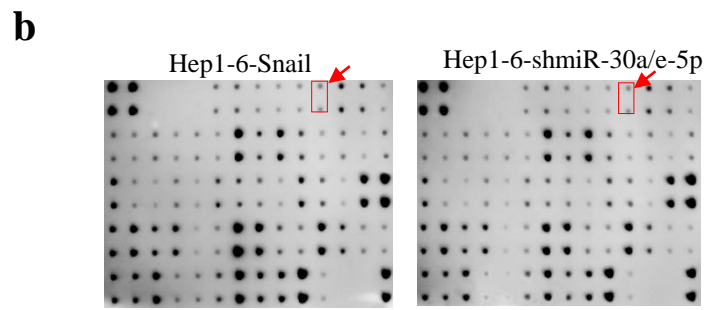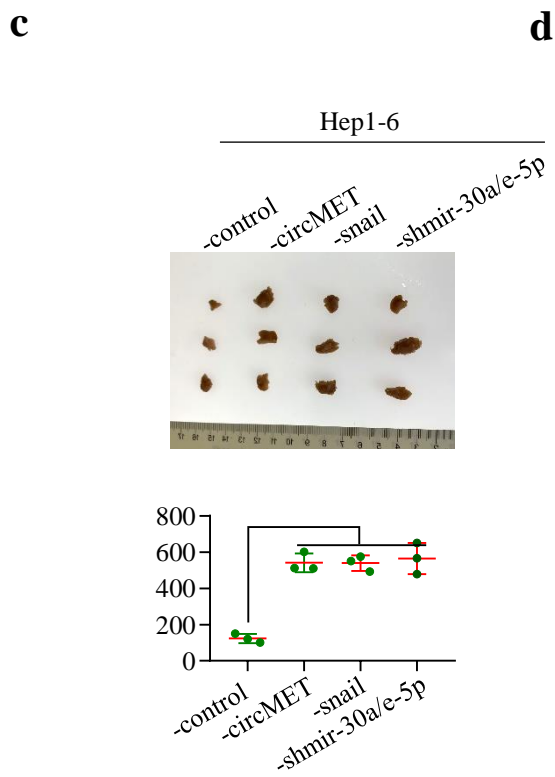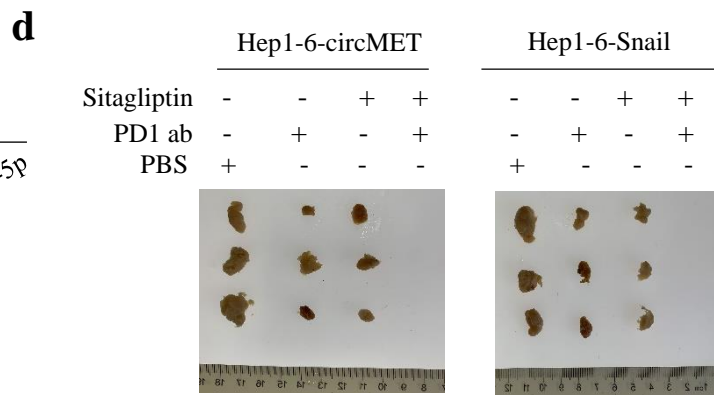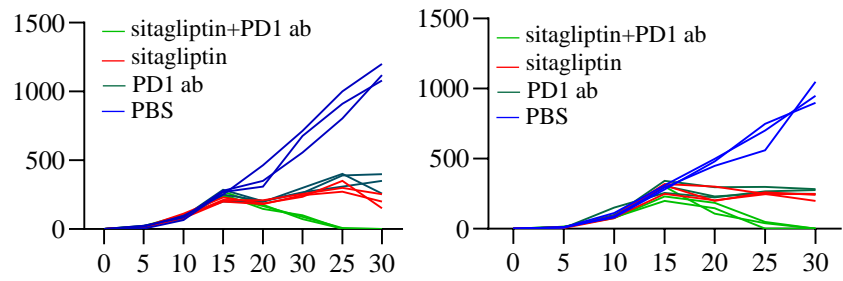

**Figure S5**
